# Supplementary material
Source: PubMed Central journal article supplement (PMC7541417)

A

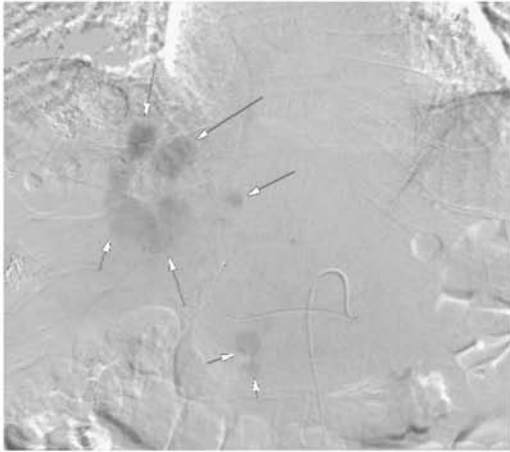

B

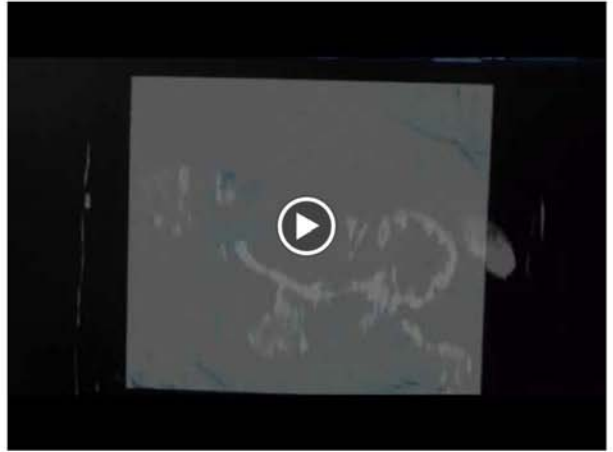

Journal Pre-proc

### Total catheterization times (min)

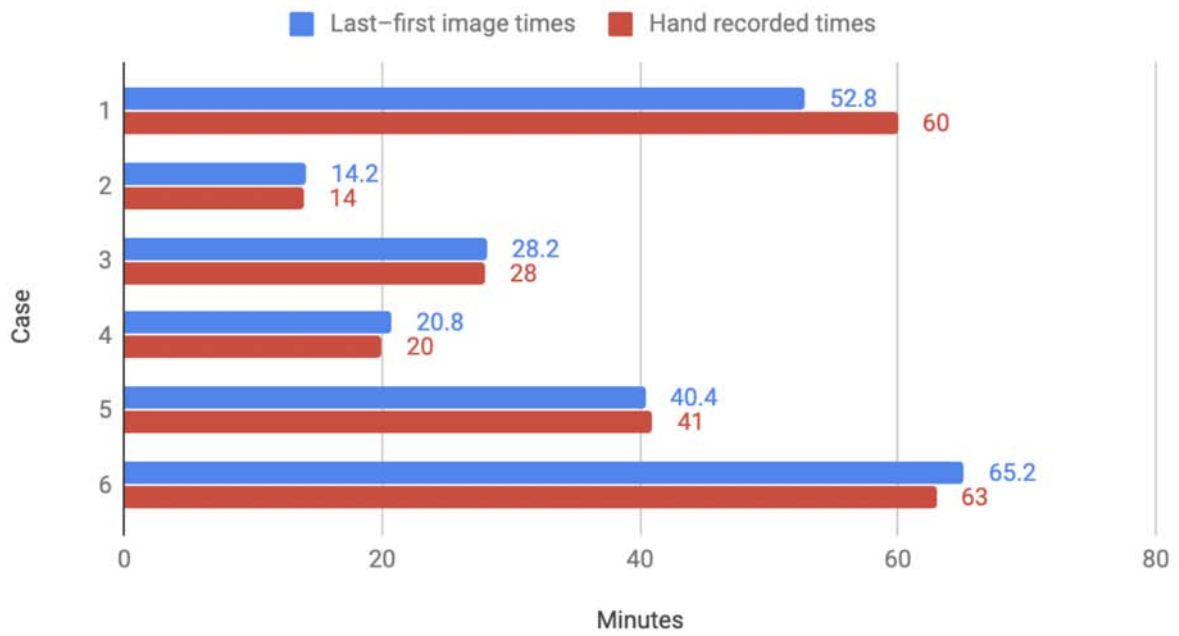

Journal Pre

Supplement: NIHMS1568924-supplement-3.pdf [file NIHMS1568924-supplement-3.pdf]
